# Supplementary material for: Coupling of digital image processing and three-way calibration to assist a paper-based sensor for determination of nitrite in food samples
Source: PubMed Central journal article supplement — RSC Adv. 2020 Apr 8;10(24):14422–30. doi: 10.1039/c9ra10918h (PMC9051906; doi:10.1039/c9ra10918h), 2020-04-08
Supplement: RA-010-C9RA10918H-s001.pdf [file RA-010-C9RA10918H-s001.pdf]

## Supplementary Information of the work entitled “Coupling of digital image processing and three-way calibration to assist a paper-based sensor for determination of nitrite in food samples”

Zohreh Almasvandi<sup>a</sup>, Ali Vahidinia<sup>a</sup>, Ali Heshmati<sup>a</sup>, Mohammad Mahdi Zangeneh<sup>b,c</sup>, Hector C. Goicoechea<sup>d</sup>,  
Ali R. Jalalvand<sup>e,\*</sup>

<sup>a</sup>*Department of Nutrition and Food Hygiene, School of Medicine, Hamadan University of Medical Sciences, Hamadan, Iran*

<sup>b</sup>*Department of Clinical Sciences, Faculty of Veterinary Medicine, Razi University, Kermanshah, Iran*

<sup>c</sup>*Biotechnology and Medicinal Plants Research Center, Ilam University of Medical Sciences, Ilam, Iran*

<sup>d</sup>*Laboratorio de Desarrollo Analítico y Quimiometría (LADAQ), Catedra de Química Analítica I, Universidad Nacional del Litoral, Ciudad Universitaria, CC242 (S3000ZAA), Santa Fe, Argentina*

<sup>e</sup>*Research Center of Oils and Fats, Kermanshah University of Medical Sciences, Kermanshah, Iran*

\*Corresponding Authors: [ali.jalalvand1984@gmail.com](mailto:ali.jalalvand1984@gmail.com) (A.R. Jalalvand)

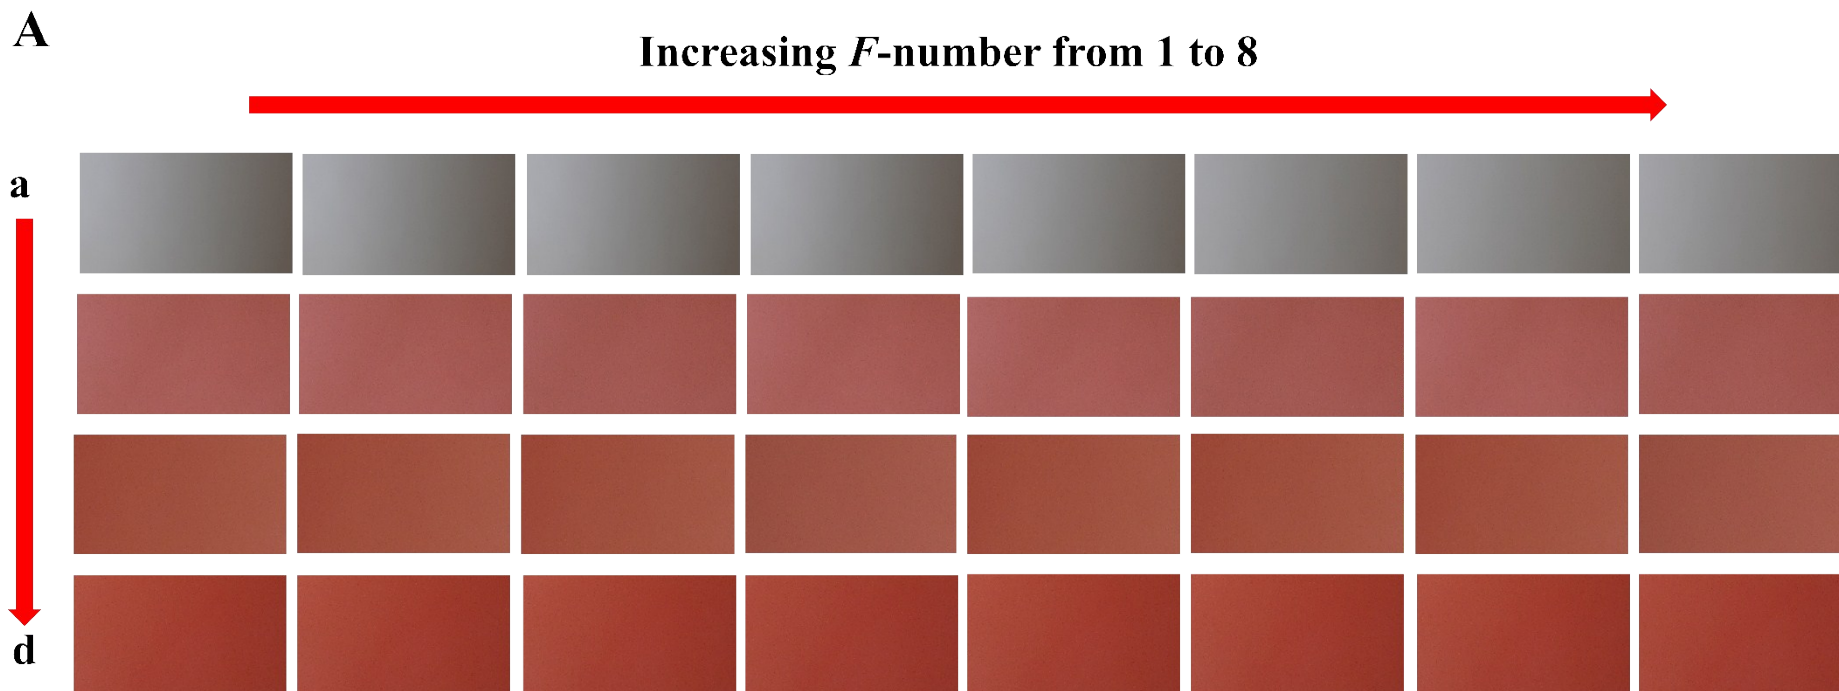

**Fig. S1.** The images of: (A) cabbage: (a) non-spiked, (b) 500 ppm spiked, (c) 250 ppm spiked, (d) 50 ppm spiked, (B) carrot: (a) non-spiked, (b) 500 ppm spiked, (c) 200 ppm spiked, (d) 50 ppm spiked, (C) lettuce: (a) non-spiked, (b) 450 ppm spiked, (c) 300 ppm spiked, (d) 50 ppm spiked, (D) watermelon: (a) non-spiked, (b) 500 ppm spiked, (c) 200 ppm spiked, (d) 100 ppm spiked, (E) onion: (a) non-spiked, (b) 400 ppm spiked, (c) 250 ppm spiked, (d) 20 ppm spiked, (F) potato: (a) non-spiked, (b) 500 ppm spiked, (c) 100 ppm spiked, (d) 10 ppm spiked, (G) kielbasa (Andre): (a) non-spiked, (b) 100 ppm spiked, (c) 10 ppm spiked, (H) kielbasa (Armen): (a) non-spiked, (b) 500 ppm spiked, (c) 50 ppm spiked, (I) kielbasa (Sham Sham): (a) non-spiked, (b) 500 ppm spiked, (c) 50 ppm spiked, (J) kielbasa (Dalahoo): (a) non-spiked, (b) 700 ppm spiked, (c) 500 ppm spiked, (K) sausage (Andre): (a) non-spiked, (b) 500 ppm spiked, (c) 100 ppm spiked, (L) sausage (Armen): (a) non-spiked, (b) 100 ppm spiked, (c) 10 ppm spiked, (M) sausage (Sham Sham): (a) non-spiked, (b) 200 ppm spiked, (c) 100 ppm spiked and (N) sausage (Silico): (a) non-spiked, (b) 200 ppm spiked, (c) 20 ppm spiked.

**B**

Increasing  $F$ -number from 1 to 8

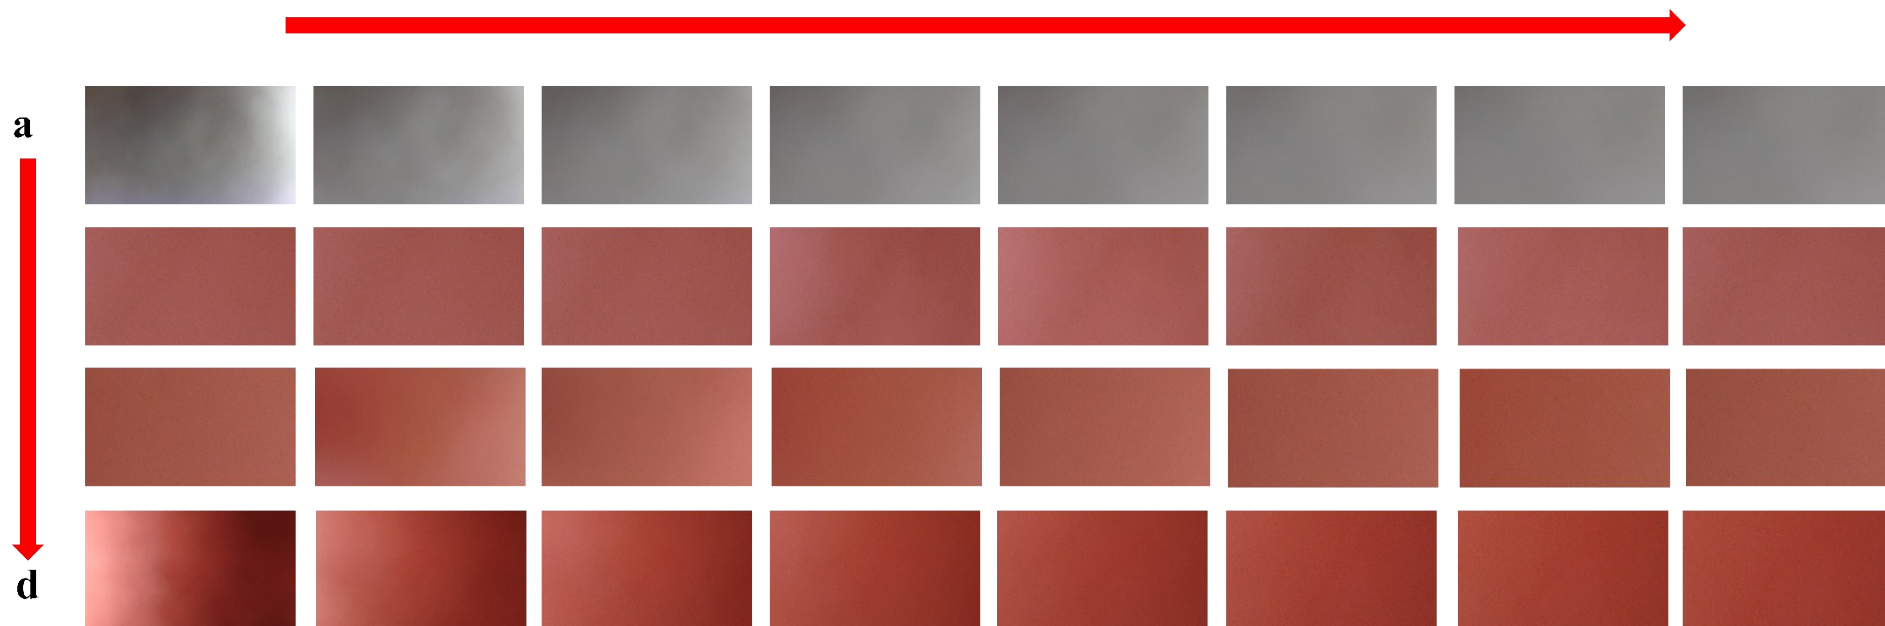

**Fig. S1.** Continued.

C

Increasing  $F$ -number from 1 to 8

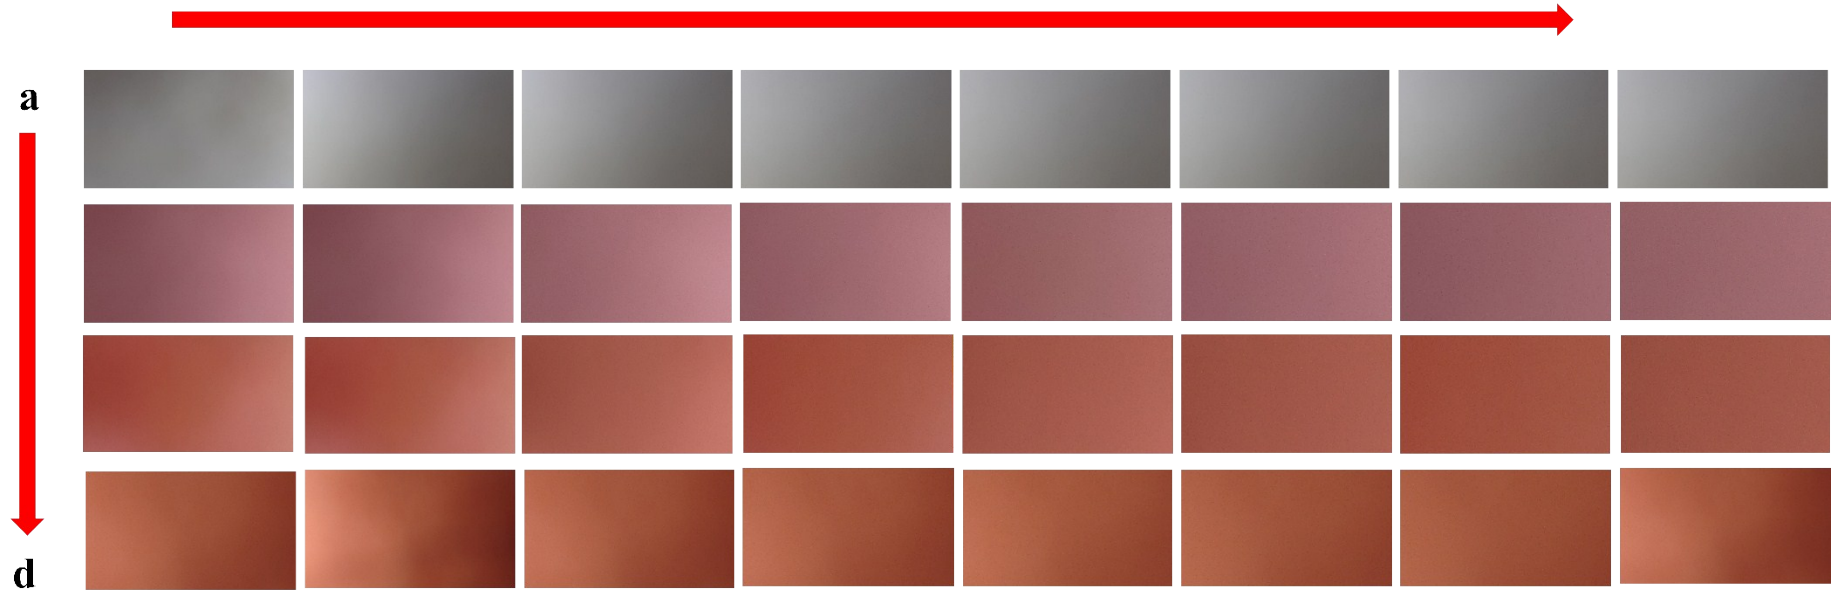

Fig. S1. Continued.

**D**

Increasing  $F$ -number from 1 to 8

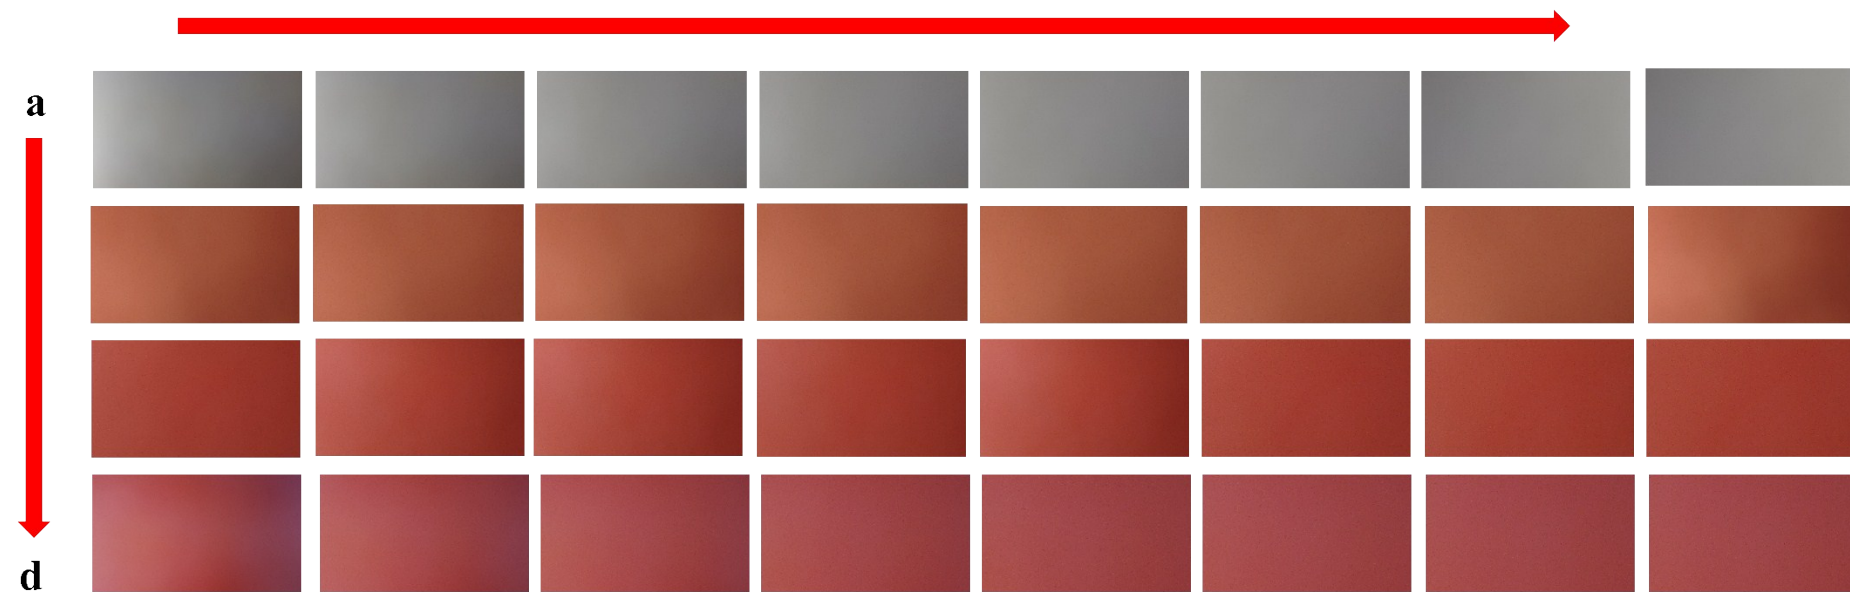

**Fig. S1.** Continued.

**E**

Increasing  $F$ -number from 1 to 8

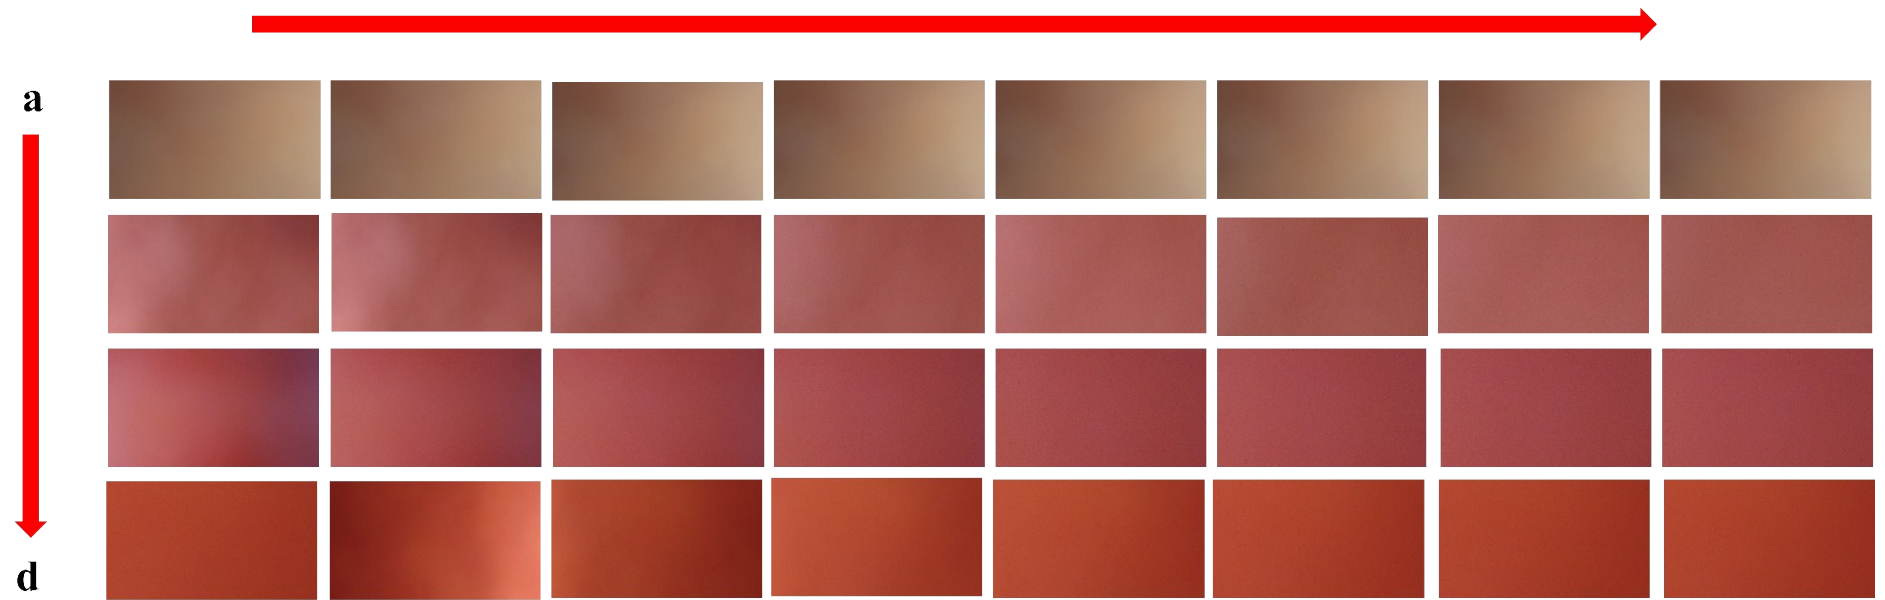

**Fig. S1.** Continued.

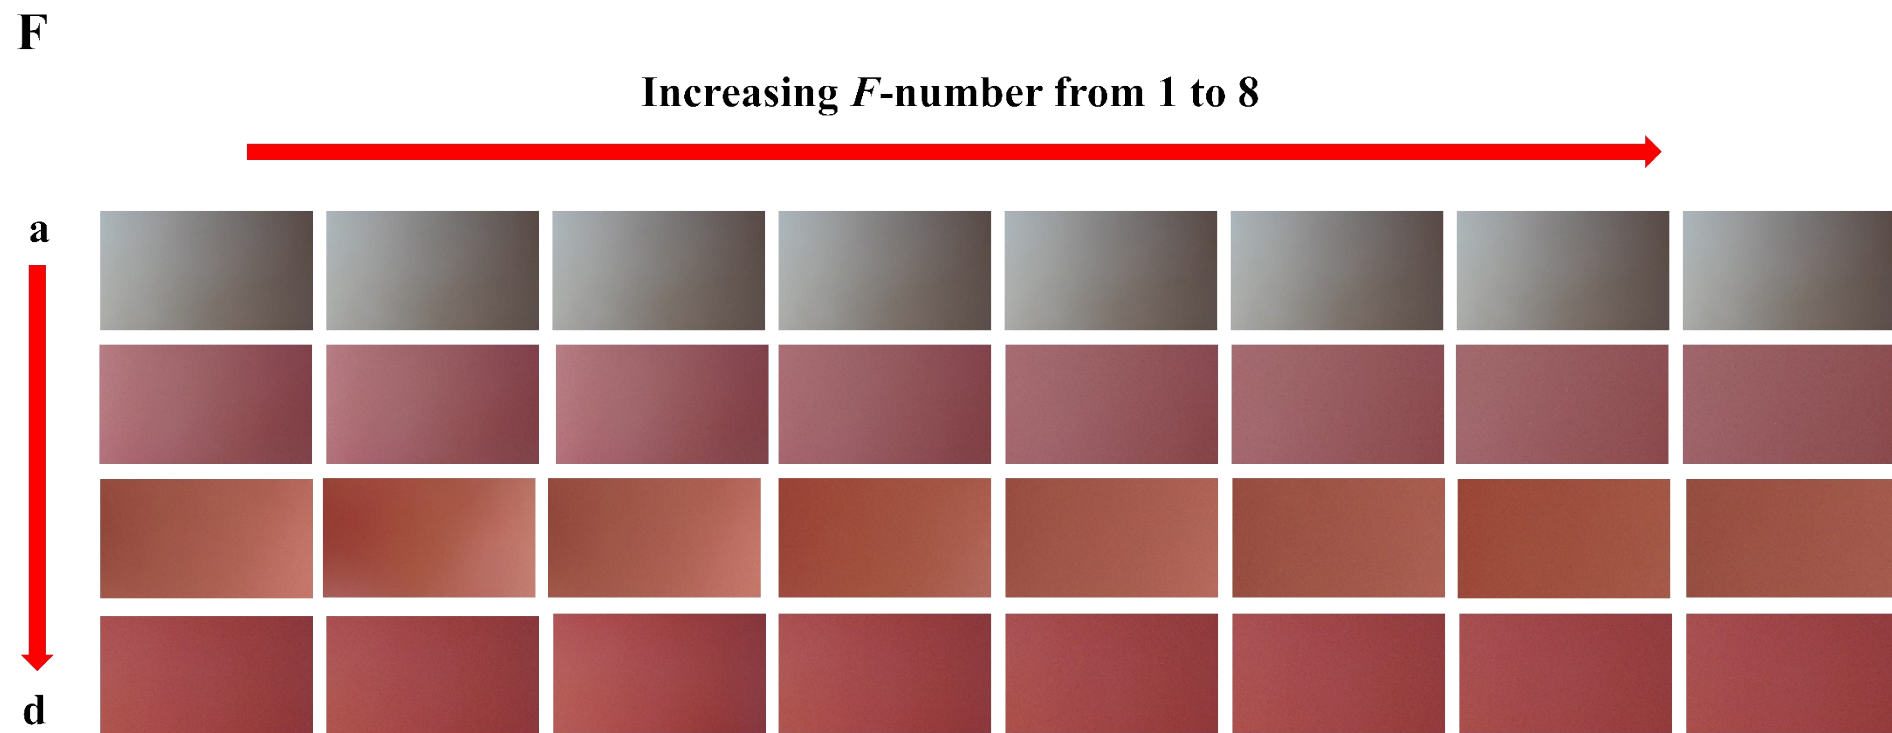

Fig. S1. Continued.



**G**

Increasing  $F$ -number from 1 to 8

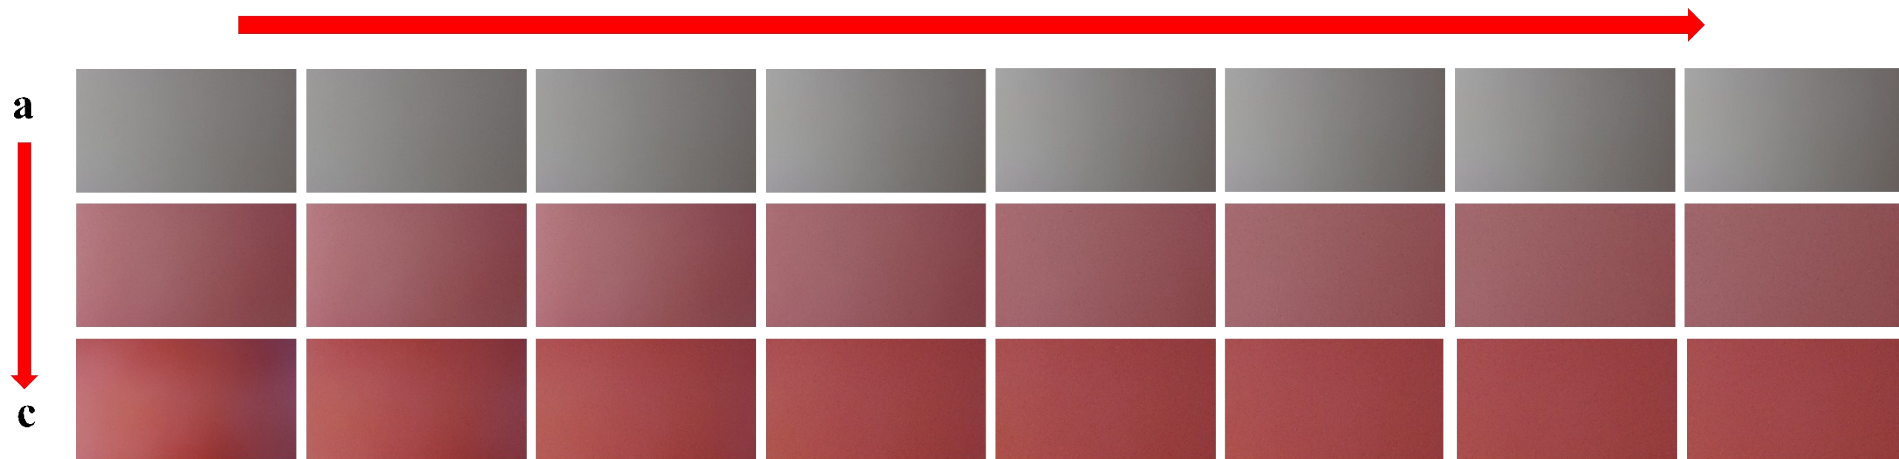

**Fig. S1.** Continued.



H

Increasing  $F$ -number from 1 to 8

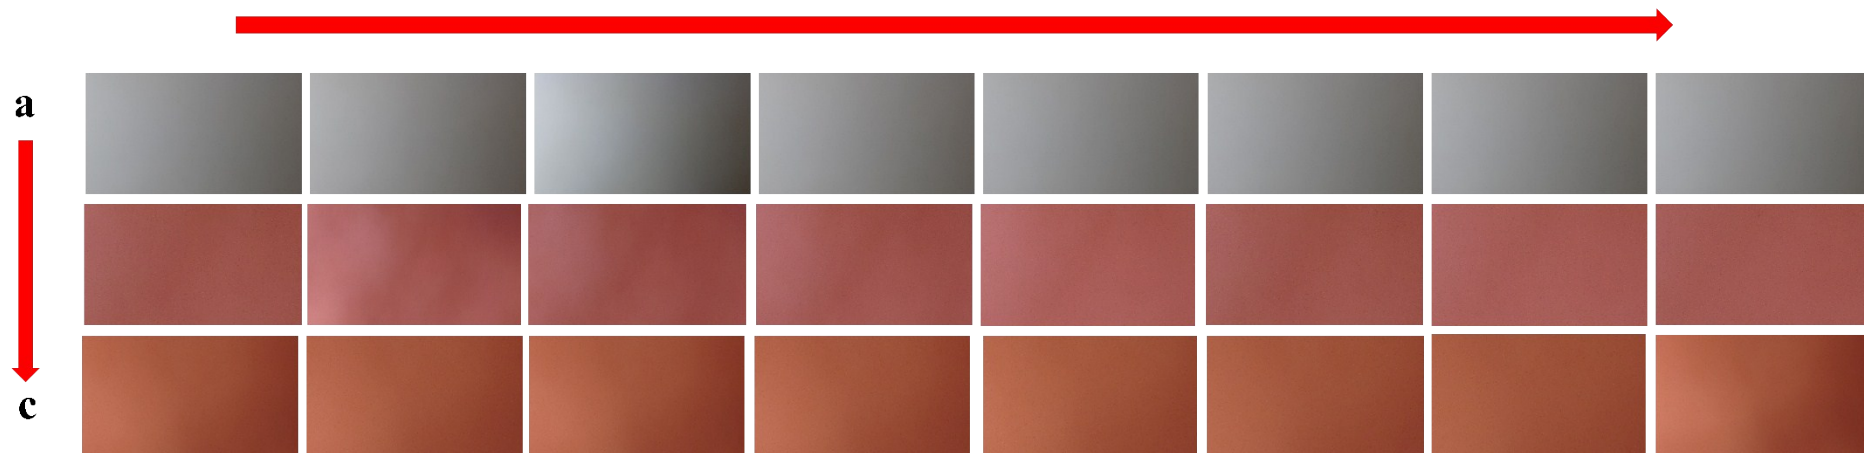

Fig. S1. Continued.

I

Increasing  $F$ -number from 1 to 8

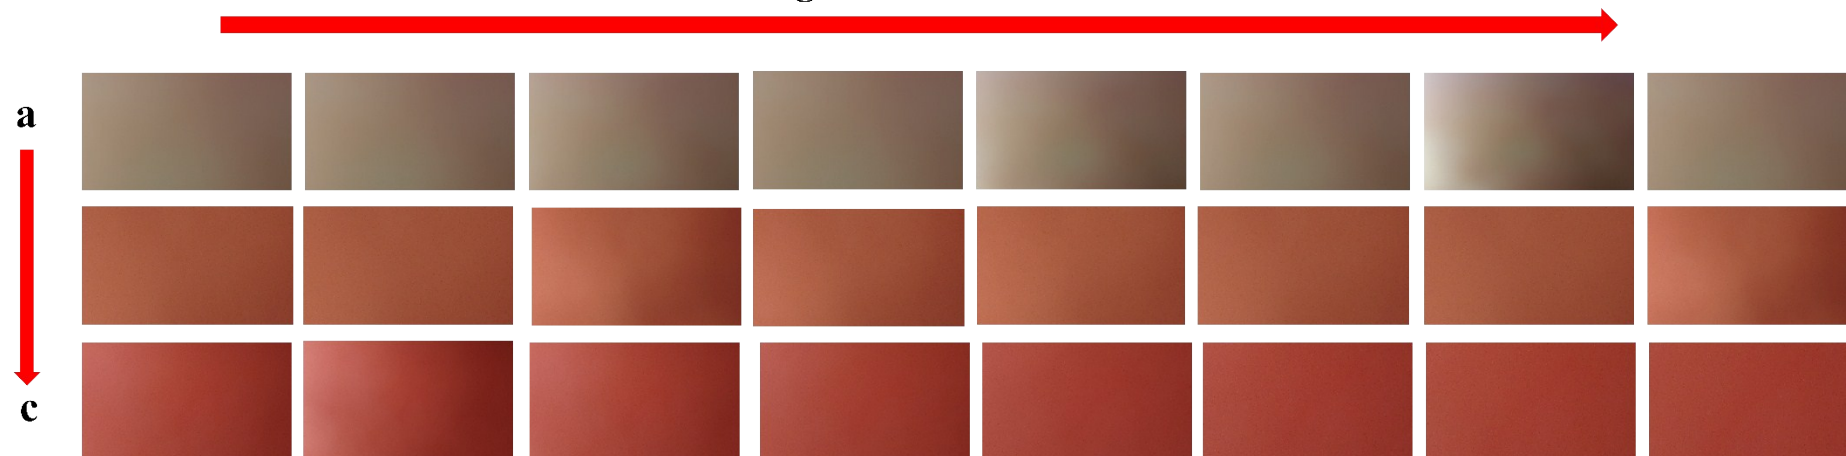

Fig. S1. Continued.

**J**

Increasing  $F$ -number from 1 to 8

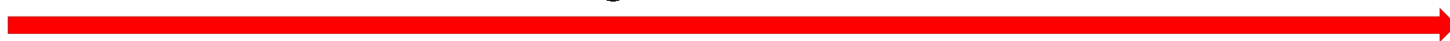

**a**

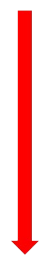

**c**

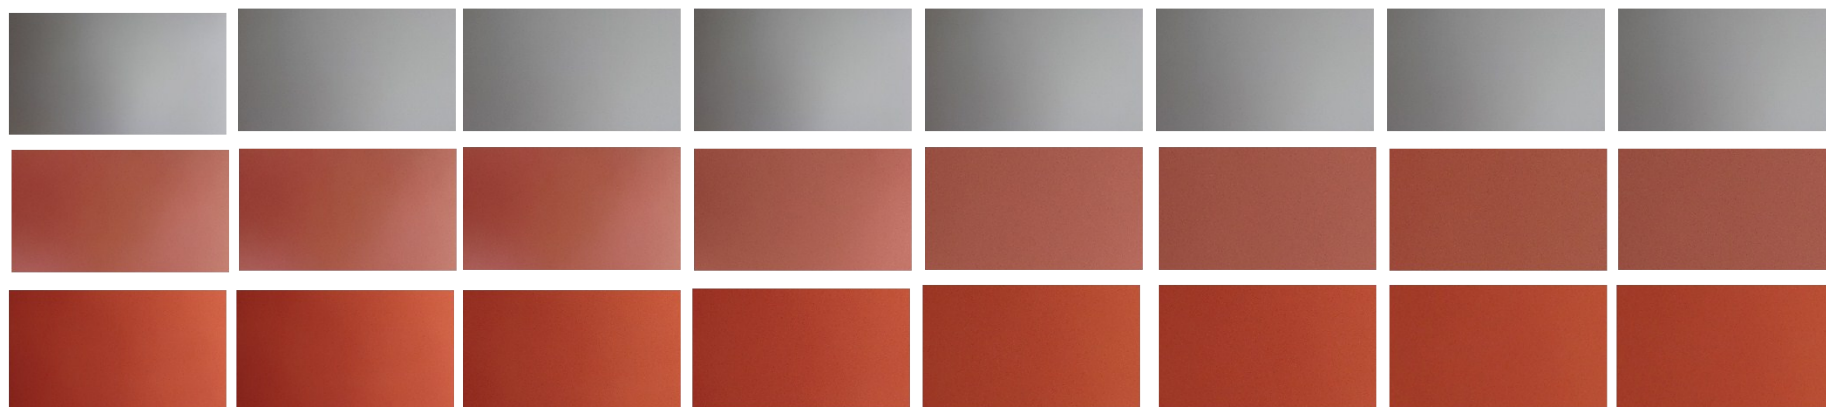

Fig. S1. Continued.

**K**

Increasing  $F$ -number from 1 to 8

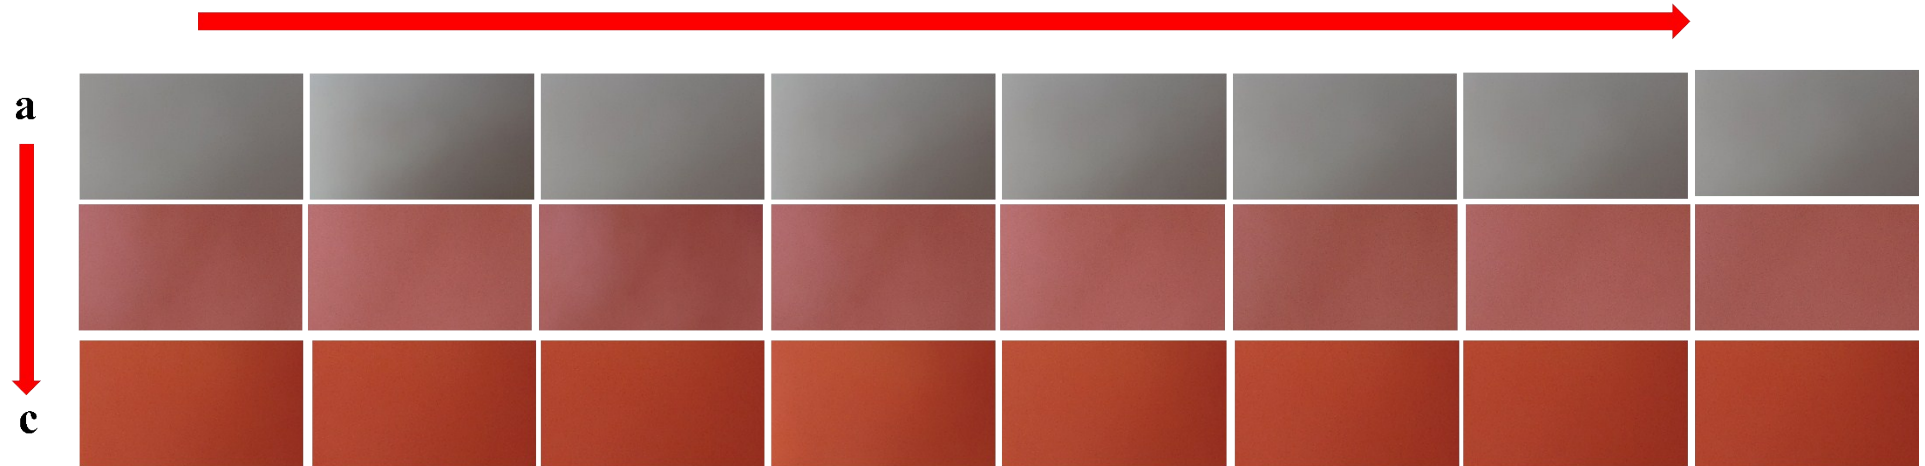

**Fig. S1.** Continued.

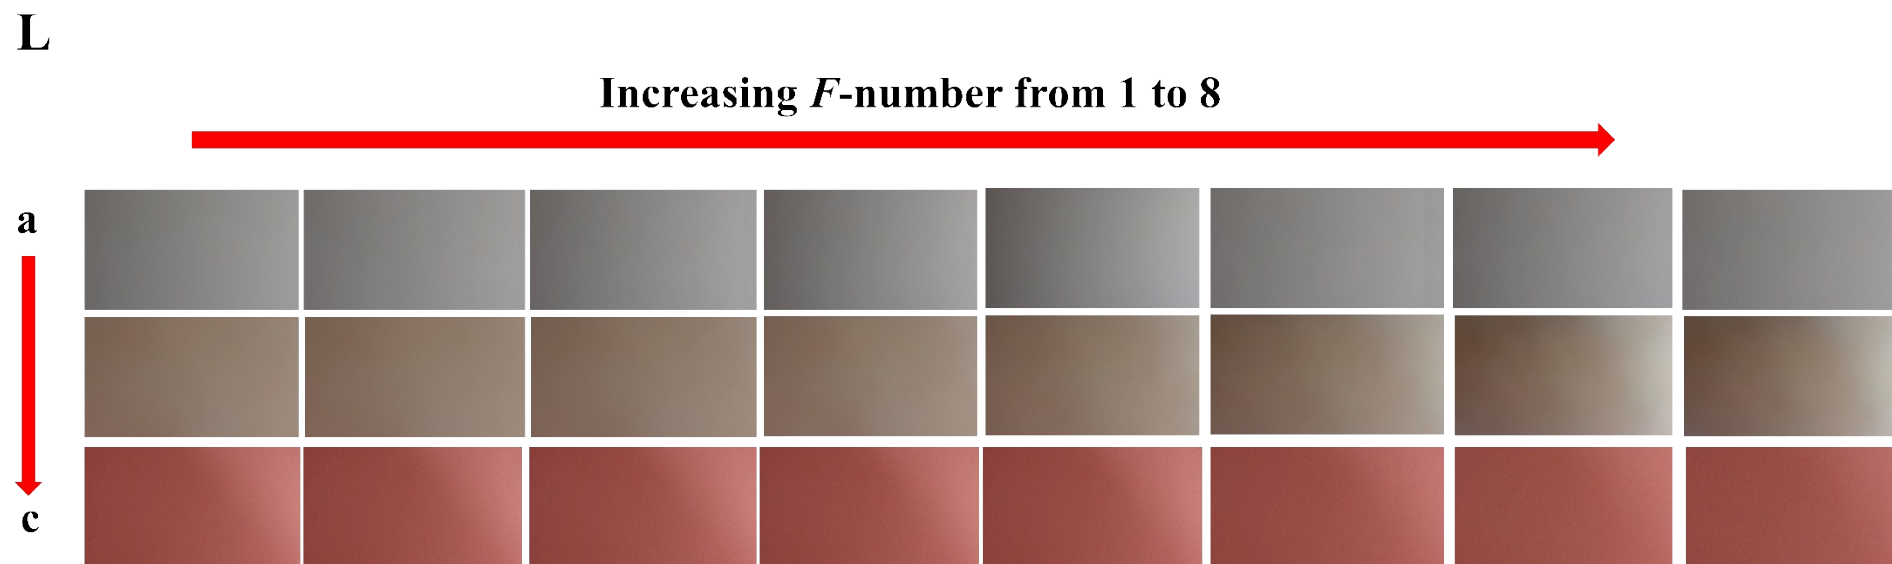

**Fig. S1.** Continued.

**M**

Increasing  $F$ -number from 1 to 8

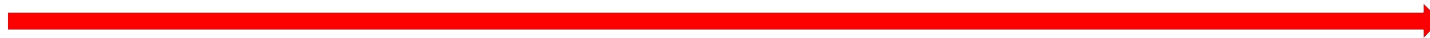

**a**

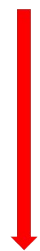

**c**

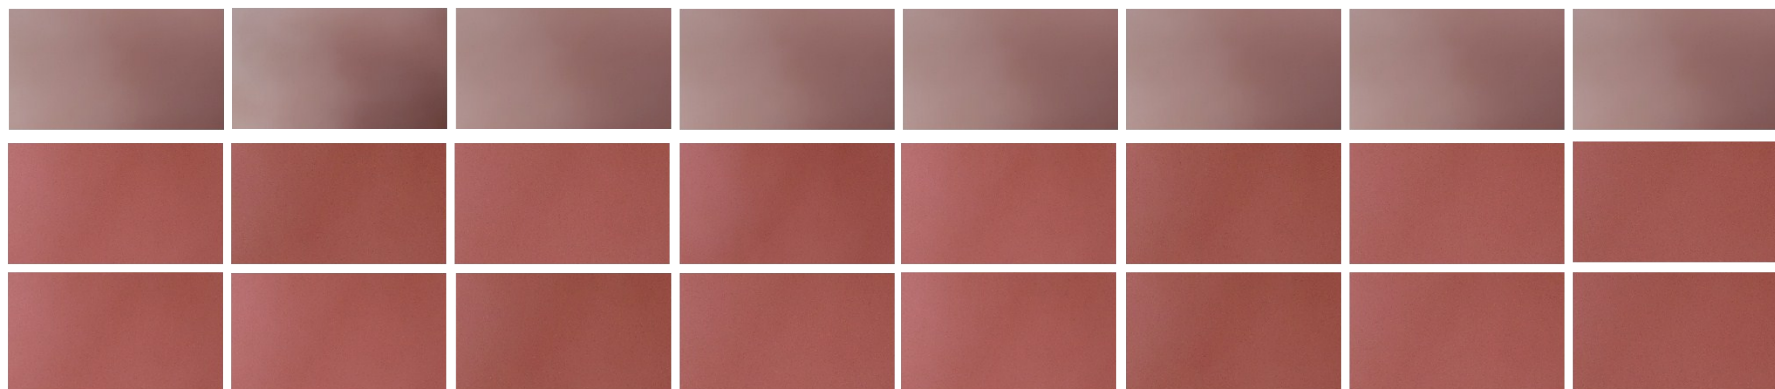

**Fig. S1.** Continued.

N

Increasing  $F$ -number from 1 to 8

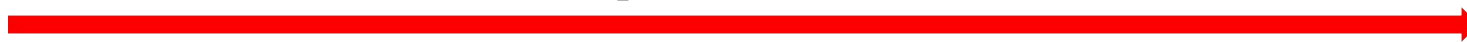

a  
↓  
c

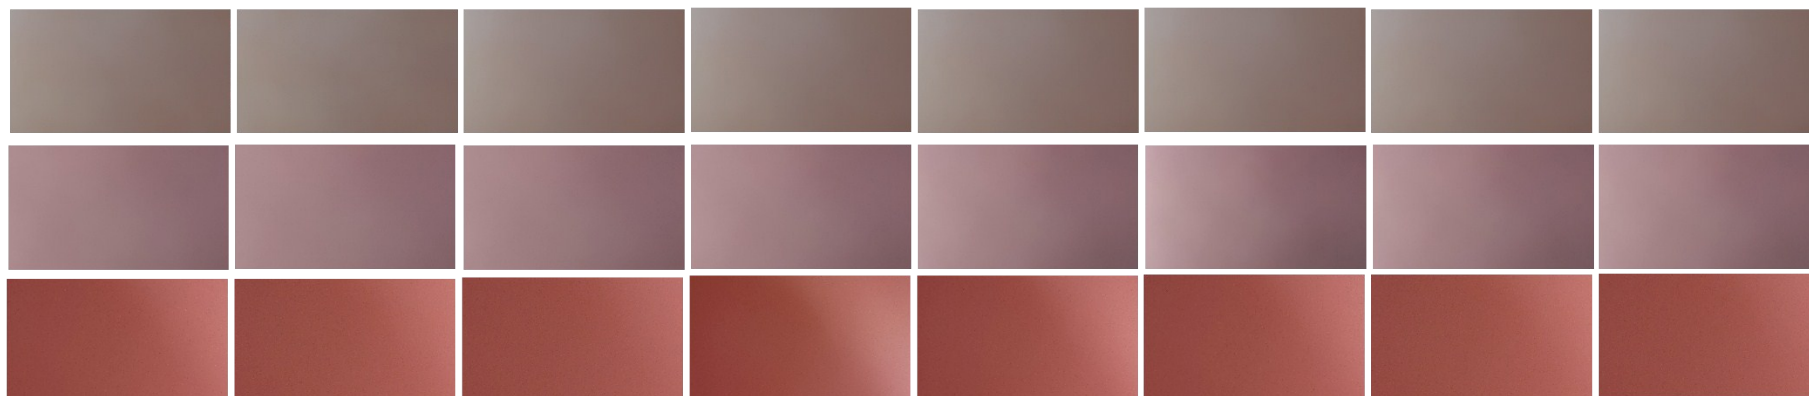

Fig. S1. Continued.
